# Supplementary material for: Seeded growth of ZnO nanowires in dye-containing solution: the submerged plant analogy and its application in photodegradation of dye pollutants
Source: Royal Society of Chemistry journal article supplement (doi:10.1039/d0ce00533a), 2020-01-01
Supplement: d0ce00533a1.pdf [file d0ce00533a1.pdf]

## **Supplementary Information**

### **Seeded Growth of ZnO Nanowires in Dye-Containing Solution: The Submerged Plant Analogy and Its Application in Photodegradation of Dye Pollutants**

Houjun Wang, Yun Cai, Chaoyue Wang, Hao Xu, Jun Fang and Yang Yang\*

State Key Laboratory of Materials-Oriented Chemical Engineering, College of Chemical  
Engineering, Nanjing Tech University, Nanjing 211816, China

\* Corresponding Author; Email: [yangy@njtech.edu.cn](mailto:yangy@njtech.edu.cn)

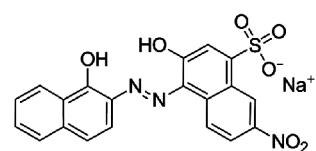

**Eriochrome Black T (EBT)**

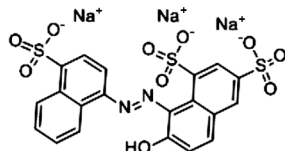

**Acid Red 18 (AR18)**

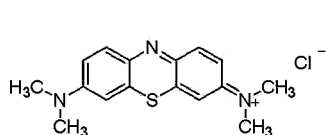

**Methylene Blue (MB)**

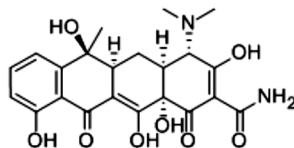

**Tetracycline (TC)**

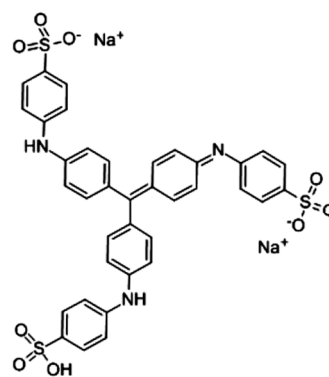

**Acid Blue 93 (AB93)**

**Scheme S1** Molecular structures of eriochrome black T (EBT), acid red 18 (AR18), acid blue 93 (AB93), methylene blue (MB), and tetracycline (TC).

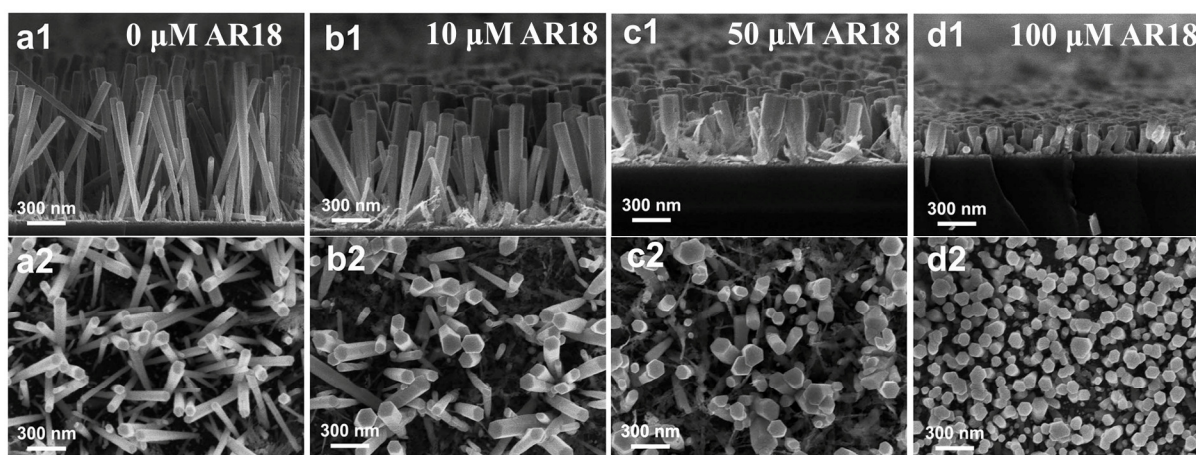

**Fig. S1** Cross-sectional SEM images of ZnO nanowire arrays prepared *via* seeded solution growth by the addition of AR18 with different concentrations: (a) 0 μM, (b) 10 μM, (c) 50 μM, and (d) 100 μM. Corresponding top-view SEM images: (a1) 0 μM, (b1) 10 μM, (c1) 50 μM, and (d1) 100 μM. The concentration of each precursor (zinc nitrate and HMTA) was maintained constant at 5 mM in all the cases.

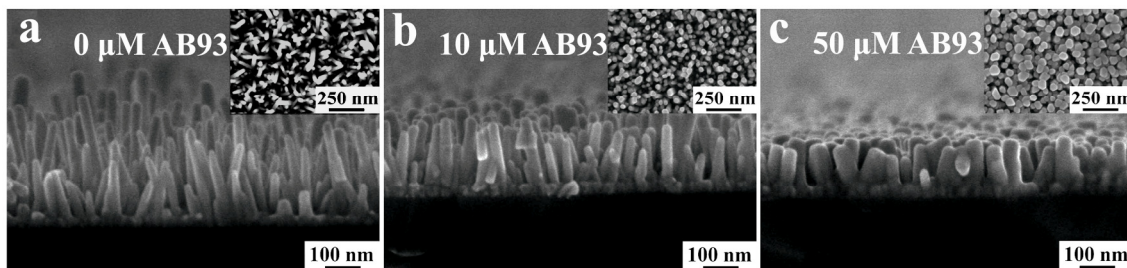

**Fig. S2** Cross-sectional SEM images of ZnO nanowire arrays prepared *via* seeded solution growth by the addition of AB93 with different concentrations: (a) 0  $\mu\text{M}$ , (b) 10  $\mu\text{M}$ , and (c) 50  $\mu\text{M}$ . Insets are corresponding top-view SEM image. The concentration of each precursor (zinc nitrate and HMTA) was maintained constant at 5 mM in all the cases.

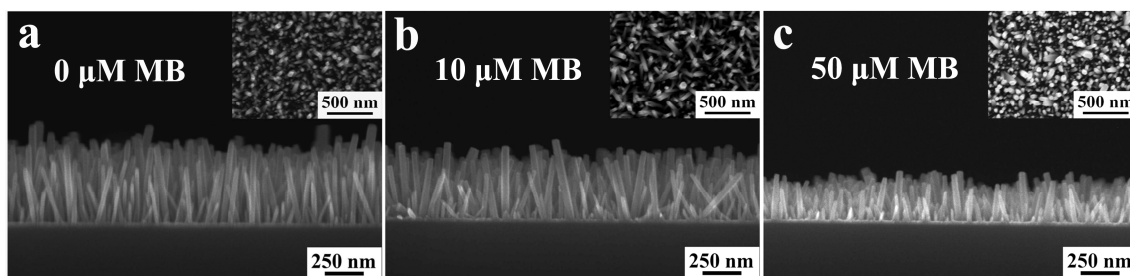

**Fig. S3** Cross-sectional SEM images of ZnO nanowire arrays prepared *via* seeded solution growth by the addition of MB with different concentrations: (a) 0  $\mu\text{M}$ , (b) 10  $\mu\text{M}$ , and (c) 50  $\mu\text{M}$ . Insets are corresponding top-view SEM image. The concentration of each precursor (zinc nitrate and HMTA) was maintained constant at 5 mM in all the cases.

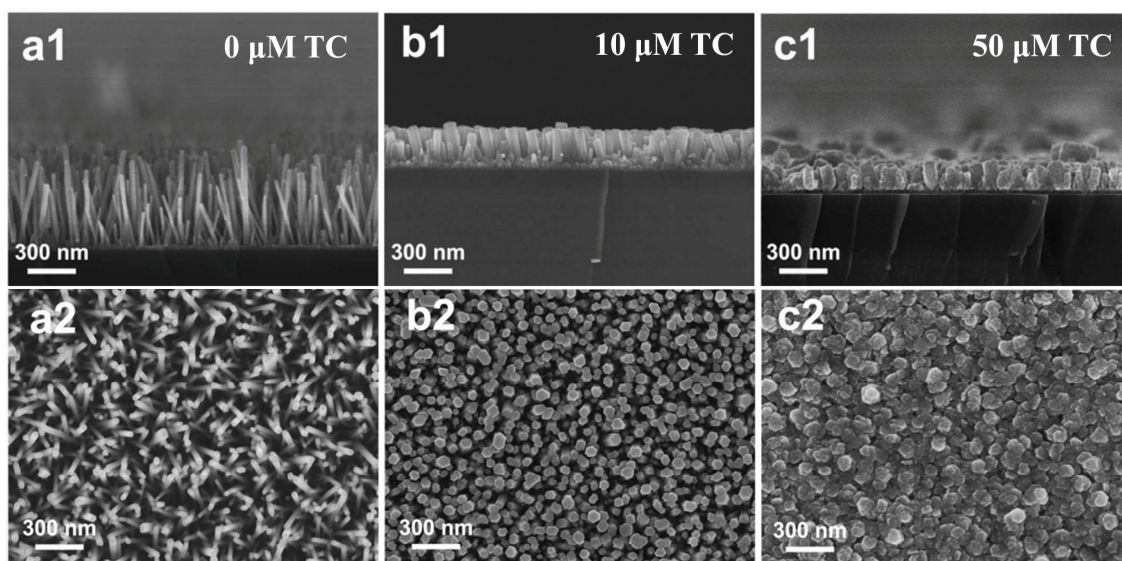

**Fig. S4** Cross-sectional SEM images of ZnO nanowire arrays prepared *via* seeded solution growth by the addition of TC with different concentrations: (a) 0  $\mu\text{M}$ , (b) 10  $\mu\text{M}$ , and (c) 50  $\mu\text{M}$ . Corresponding top-view SEM images: (a1) 0  $\mu\text{M}$ , (b1) 10  $\mu\text{M}$ , and (c1) 50  $\mu\text{M}$ . The concentration of each precursor (zinc nitrate and HMTA) was maintained constant at 5 mM in all the cases.

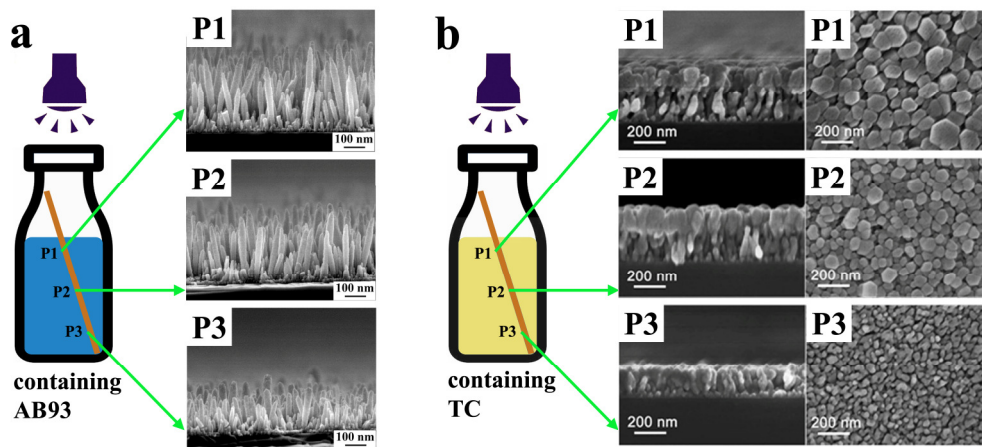

**Fig. S5** Schematic illustration of seeded growth of ZnO nanowire arrays with the addition of AB93 (a) and TC (b) under vectored light irradiation in the water bath at 90  $^{\circ}\text{C}$  for 5 h; P1, P2 and P3 are the SEM images of ZnO nanowire arrays (side-views) grown at different locations of the substrate as labeled on the diagram of the reaction vessel.

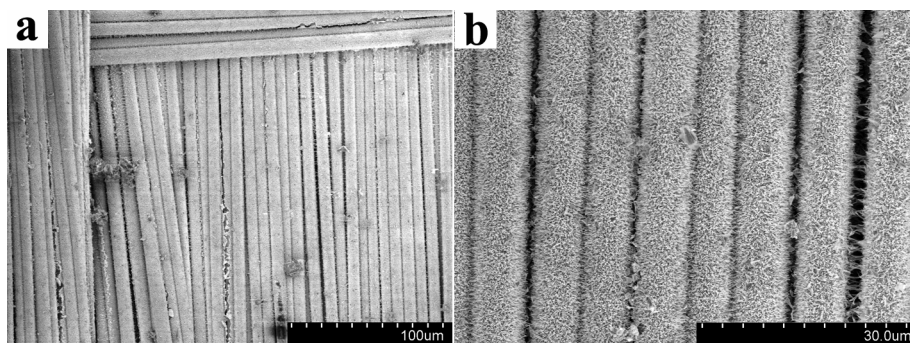

**Fig. S6** Low-magnification SEM images of ZnO nanowire arrays grown on glass fiber cloth without the addition of EBT.
